# Supplementary material
Source: PubMed Central journal article supplement (PMC5067856)
Supplement: Supp_Fig1.pdf [file Supp_Fig1.pdf]

## Supplementary Figure S1

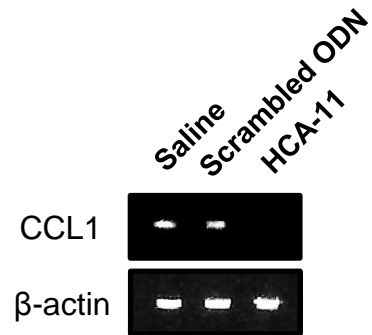

Fig. S1. CCL1 mRNA expression in CCL1<sup>+</sup>CD163<sup>+</sup>CD14<sup>+</sup> cells treated with HCA-11. CCL1 mRNA, derived from IL-1 $\beta$ /IgG-CCL1<sup>+</sup>CD163<sup>+</sup>CD14<sup>+</sup> cells ( $3 \times 10^5$  cells/ml) cultured with 100  $\mu$ g/ml of HCA-11 for 2 days, were assayed by RT-PCR.
